# Supplementary material for: Assembly of a heterodinuclear Mn/Fe cofactor is coupled to tyrosine–valine ether cross-link formation in the R2-like ligand-binding oxidase
Source: Springer Nature journal article supplement (doi:10.1007/s00775-019-01639-4), 2019-01-28
Supplement: MOESM1 [file 775_2019_1639_MOESM1_ESM.pdf]

Electronic Supplementary Material for:

**Assembly of a heterodinuclear Mn/Fe cofactor is coupled to tyrosine-valine ether cross-link formation in the R2-like ligand-binding oxidase**

**Julia J. Griese<sup>1,2</sup>(✉), Ramona Kositzki<sup>3</sup>, Michael Haumann<sup>3</sup>, and Martin Högbom<sup>1</sup>(✉)**

<sup>1</sup>Department of Biochemistry and Biophysics, Stockholm University, SE-106 91 Stockholm, Sweden; <sup>2</sup>Department of Cell and Molecular Biology, Uppsala University, SE-751 24 Uppsala, Sweden; <sup>3</sup>Institut für Experimentalphysik, Freie Universität Berlin, D-14195 Berlin, Germany.

✉ E-mail: julia.griese@icm.uu.se; hogbom@dbb.su.se

The Electronic Supplementary Material contains:

**Table S1** Crystallographic data statistics.

**Table S2** Refinement statistics.

**References**

**Table S1** Crystallographic data statistics

| <b>R2lox variant</b>                | <b>V72A</b>               |                            |                           |                           |                           |                           |
|-------------------------------------|---------------------------|----------------------------|---------------------------|---------------------------|---------------------------|---------------------------|
| <b>Soaking condition</b>            | <b>anoxic Mn+Fe</b>       |                            |                           |                           |                           |                           |
| Crystal                             | 1                         | 2                          | 2                         | 3                         | 3                         | 3                         |
| Beamline                            | X06SA/SLS                 | X06SA/SLS                  | X06SA/SLS                 | X06SA/SLS                 | X06SA/SLS                 | X06SA/SLS                 |
| Detector                            | Pilatus 6MF               | Pilatus 6MF                | Pilatus 6MF               | Pilatus 6MF               | Pilatus 6MF               | Pilatus 6MF               |
| Dataset                             | Fe peak                   | Mn peak                    | Fe peak                   | Mn peak                   | Fe peak                   | Mn peak                   |
| Wavelength (Å)                      | 1.73                      | 1.88                       | 1.73                      | 1.88                      | 1.73                      | 1.88                      |
| Resolution range (Å)                | 50.00-2.98<br>(3.16-2.98) | 50.00-2.98 (3.16-<br>2.98) | 50.00-3.00<br>(3.18-3.00) | 50.00-2.97<br>(3.15-2.97) | 50.00-3.00<br>(3.18-3.00) | 50.00-2.99<br>(3.17-2.99) |
| Space group                         | C2                        | C2                         | C2                        | C2                        | C2                        | C2                        |
| Unit cell dimensions<br>a, b, c (Å) | 161.36, 55.62,<br>70.04   | 161.48, 55.63,<br>70.07    | 161.77, 55.71,<br>70.18   | 161.70, 55.69,<br>70.13   | 162.13, 55.58,<br>70.10   | 162.13, 55.59,<br>70.12   |
| $\beta$ (°)                         | 114.13                    | 114.13                     | 114.18                    | 114.18                    | 114.34                    | 114.35                    |
| Unique reflections                  | 21331 (3206)              | 20921(2970)                | 21837 (3422)              | 21525 (2892)              | 21869 (3447)              | 21697 (3384)              |
| Multiplicity                        | 3.4                       | 3.3                        | 3.4                       | 3.3                       | 3.5                       | 3.4                       |
| Completeness (%)                    | 93.8 (86.8)               | 91.5 (81.3)                | 96.9 (93.3)               | 93.1 (77.9)               | 97.1 (94.3)               | 96.1(92.4)                |
| $I/\sigma(I)$                       | 25.91 (12.73)             | 16.04 (6.38)               | 24.88 (12.25)             | 12.91 (4.92)              | 20.20 (10.82)             | 14.94 (6.52)              |
| $R_{\text{merge}}$ (%)              | 3.7 (8.0)                 | 5.7 (14.5)                 | 3.8 (8.4)                 | 7.1 (19.0)                | 4.9 (9.4)                 | 6.3 (15.0)                |
| $R_{\text{meas}}$ (%)               | 4.4 (9.6)                 | 6.8 (17.6)                 | 4.5 (10.1)                | 8.5 (23.1)                | 5.8 (11.6)                | 7.6 (18.1)                |
| $CC_{1/2}$ <sup>a</sup>             | 99.8 (99.3)               | 99.6 (97.6)                | 99.8 (99.1)               | 99.5 (96.0)               | 99.7 (98.8)               | 99.6 (97.3)               |
| Anomalous signal                    | 1.37 (1.11)               | 0.97 (0.95)                | 1.35 (1.01)               | 0.87 (0.86)               | 1.16 (0.96)               | 0.87 (0.81)               |

Values in parentheses are for the highest resolution shell. For native datasets, Friedel pairs were merged<sup>a</sup>Percentage of correlation between intensities from random half-datasets [1]. The correlation is significant at the 0.1% level in all resolution shells in all datasets.

**Table S1 (continued)** Crystallographic data statistics

| <b>R2lox variant</b>                | <b>V72A</b>               |                           |                           |                           |                           |                           |
|-------------------------------------|---------------------------|---------------------------|---------------------------|---------------------------|---------------------------|---------------------------|
| <b>Soaking condition</b>            | <b>aerobic Mn+Fe</b>      |                           |                           |                           |                           |                           |
| <b>Crystal</b>                      | 1                         | 2                         | 2                         | 3                         | 3                         | 3                         |
| Beamline                            | X06SA/SLS                 | X06SA/SLS                 | X06SA/SLS                 | X06SA/SLS                 | X06SA/SLS                 | X06SA/SLS                 |
| Detector                            | Pilatus 6MF               | Pilatus 6MF               | Pilatus 6MF               | Pilatus 6MF               | Pilatus 6MF               | Pilatus 6MF               |
| Dataset                             | Fe peak                   | Mn peak                   | Fe peak                   | Mn peak                   | Fe peak                   | Mn peak                   |
| Wavelength (Å)                      | 1.73                      | 1.88                      | 1.73                      | 1.88                      | 1.73                      | 1.88                      |
| Resolution range (Å)                | 50.00-2.99<br>(3.17-2.99) | 50.00-2.99<br>(3.17-2.99) | 50.00-2.99<br>(3.17-2.99) | 50.00-2.98<br>(3.16-2.98) | 50.00-2.97<br>(3.15-2.97) | 50.00-2.99<br>(3.17-2.99) |
| Space group                         | C2                        | C2                        | C2                        | C2                        | C2                        | C2                        |
| Unit cell dimensions<br>a, b, c (Å) | 162.73, 55.79,<br>69.80   | 162.58, 55.80,<br>69.73   | 162.65, 55.80,<br>69.72   | 162.62, 55.83,<br>69.74   | 162.63, 55.76,<br>69.57   | 162.49, 55.77,<br>69.46   |
| $\beta$ (°)                         | 114.23                    | 114.15                    | 114.05                    | 114.07                    | 114.19                    | 114.14                    |
| Unique reflections                  | 21831 (3375)              | 21538 (3278)              | 21962 (3370)              | 21885 (3207)              | 21528 (3045)              | 21797 (3332)              |
| Multiplicity                        | 3.4                       | 3.3                       | 3.4                       | 3.3                       | 3.3                       | 3.4                       |
| Completeness (%)                    | 96.1 (91.9)               | 94.6 (88.9)               | 96.4 (91.3)               | 95.2 (86.4)               | 93.4 (81.7)               | 96.7 (92.2)               |
| $I/\sigma(I)$                       | 17.11 (6.32)              | 11.80 (3.82)              | 12.41 (3.53)              | 9.41 (2.70)               | 11.13 (2.93)              | 7.21 (1.91)               |
| $R_{\text{merge}}$ (%)              | 5.3 (15.9)                | 7.6 (24.4)                | 7.8 (29.8)                | 9.8 (33.4)                | 8.2 (34.4)                | 13.8 (52.2)               |
| $R_{\text{meas}}$ (%)               | 6.3 (19.1)                | 9.1 (29.4)                | 9.2 (35.8)                | 11.7 (40.3)               | 9.9 (41.5)                | 16.5 (62.8)               |
| $CC_{1/2}$ <sup>a</sup>             | 99.8 (97.6)               | 99.6 (93.9)               | 99.6 (92.6)               | 99.3 (87.7)               | 99.5 (89.9)               | 98.8 (70.1)               |
| Anomalous signal                    | 1.06 (0.81)               | 0.85 (0.76)               | 0.98 (0.80)               | 0.88 (0.77)               | 0.89 (0.73)               | 0.83 (0.78)               |

Values in parentheses are for the highest resolution shell. For native datasets, Friedel pairs were merged <sup>a</sup>Percentage of correlation between intensities from random half-datasets [1]. The correlation is significant at the 0.1% level in all resolution shells in all datasets.

**Table S1 (continued)** Crystallographic data statistics

| <b>R2lox variant</b>                | <b>V72I</b>               |                           |                           |                           |                           |                            |
|-------------------------------------|---------------------------|---------------------------|---------------------------|---------------------------|---------------------------|----------------------------|
| <b>Soaking condition</b>            | <b>anoxic Mn+Fe</b>       |                           |                           |                           |                           |                            |
| <b>Crystal</b>                      | <b>1</b>                  |                           | <b>2</b>                  |                           | <b>3</b>                  |                            |
| Beamline                            | X06SA/SLS                 | X06SA/SLS                 | X06SA/SLS                 | X06SA/SLS                 | X06SA/SLS                 | X06SA/SLS                  |
| Detector                            | Eiger 16M                 | Eiger 16M                 | Eiger 16M                 | Eiger 16M                 | Eiger 16M                 | Eiger 16M                  |
| Dataset                             | Fe peak                   | Mn peak                   | Fe peak                   | Mn peak                   | Fe peak                   | Mn peak                    |
| Wavelength (Å)                      | 1.73                      | 1.88                      | 1.73                      | 1.88                      | 1.73                      | 1.88                       |
| Resolution range (Å)                | 50.00-3.00<br>(3.19-3.00) | 50.00-3.00<br>(3.18-3.00) | 50.00-2.99<br>(3.18-2.99) | 50.00-3.00<br>(3.18-3.00) | 50.00-3.00<br>(3.18-3.00) | 50.00-2.99 (3.17-<br>2.99) |
| Space group                         | I222                      | I222                      | I222                      | I222                      | I222                      | I222                       |
| Unit cell dimensions<br>a, b, c (Å) | 55.91, 98.74,<br>128.53   | 55.89, 98.48,<br>128.41   | 55.94, 98.59,<br>128.28   | 55.97, 98.55,<br>128.37   | 55.92, 98.65,<br>128.20   | 55.96, 98.77,<br>128.34    |
| Unique reflections                  | 13654 (2219)              | 13683 (2166)              | 13723 (2174)              | 13707 (2167)              | 13683 (2175)              | 13942 (2240)               |
| Multiplicity                        | 6.6                       | 6.7                       | 6.9                       | 6.8                       | 6.9                       | 6.8                        |
| Completeness (%)                    | 99.4 (99.2)               | 99.2 (96.8)               | 99.3 (97.0)               | 99.3 (97.0)               | 99.1 (97.1)               | 98.1 (91.5)                |
| I/σ(I)                              | 12.91 (7.36)              | 11.86 (3.13)              | 18.81 (6.17)              | 10.97 (2.49)              | 16.47 (5.02)              | 12.55 (2.55)               |
| R <sub>merge</sub> (%)              | 11.9 (29.7)               | 11.3 (46.4)               | 7.6 (26.7)                | 12.0 (56.6)               | 8.7 (33.9)                | 11.9 (56.8)                |
| R <sub>meas</sub> (%)               | 12.9 (32.4)               | 12.2 (50.4)               | 8.2 (29.0)                | 13.0 (61.6)               | 9.4 (36.7)                | 12.9 (61.6)                |
| CC <sub>1/2</sub> <sup>a</sup>      | 99.5 (93.4)               | 99.7 (87.9)               | 99.8 (94.0)               | 99.7 (82.5)               | 99.8 (90.6)               | 99.8 (79.6)                |
| Anomalous signal                    | 1.40 (1.67)               | 0.90 (0.84)               | 1.17 (0.83)               | 0.88 (0.78)               | 1.12 (0.81)               | 0.89 (0.73)                |

Values in parentheses are for the highest resolution shell. For native datasets, Friedel pairs were merged <sup>a</sup>Percentage of correlation between intensities from random half-datasets [1]. The correlation is significant at the 0.1% level in all resolution shells in all datasets.

**Table S1 (continued)** Crystallographic data statistics

| <b>R2lox variant</b>                | <b>V72I</b>               |                           |                           |                           |                           |                            |
|-------------------------------------|---------------------------|---------------------------|---------------------------|---------------------------|---------------------------|----------------------------|
| <b>Soaking condition</b>            | <b>aerobic Mn+Fe</b>      |                           |                           |                           |                           |                            |
| <b>Crystal</b>                      | 1                         | 2                         | 3                         |                           |                           |                            |
| Beamline                            | X06SA/SLS                 | X06SA/SLS                 | X06SA/SLS                 | X06SA/SLS                 | X06SA/SLS                 | X06SA/SLS                  |
| Detector                            | Eiger 16M                 | Eiger 16M                 | Eiger 16M                 | Eiger 16M                 | Eiger 16M                 | Eiger 16M                  |
| Dataset                             | Fe peak                   | Mn peak                   | Fe peak                   | Mn peak                   | Fe peak                   | Mn peak                    |
| Wavelength (Å)                      | 1.73                      | 1.88                      | 1.73                      | 1.88                      | 1.73                      | 1.88                       |
| Resolution range (Å)                | 50.00-2.98<br>(3.16-2.98) | 50.00-2.98<br>(3.16-2.98) | 50.00-3.00<br>(3.18-3.00) | 50.00-2.99<br>(3.17-2.99) | 50.00-3.00<br>(3.19-3.00) | 50.00-2.99 (3.17-<br>2.99) |
| Space group                         | I222                      | I222                      | I222                      | I222                      | I222                      | I222                       |
| Unit cell dimensions<br>a, b, c (Å) | 55.56, 95.97,<br>127.97   | 55.60, 96.02,<br>127.98   | 56.00, 97.40,<br>129.62   | 55.95, 97.39,<br>129.55   | 56.01, 96.99,<br>129.75   | 56.05, 97.05,<br>129.87    |
| Unique reflections                  | 13278 (2070)              | 13551 (2172)              | 13656 (2133)              | 13676 (2132)              | 13591 (2160)              | 13637 (2012)               |
| Multiplicity                        | 6.9                       | 6.7                       | 6.8                       | 6.7                       | 7.0                       | 6.7                        |
| Completeness (%)                    | 98.5 (95.3)               | 97.9 (91.9)               | 99.1 (95.3)               | 99.0 (95.1)               | 99.7 (98.8)               | 98.3 (90.0)                |
| I/σ(I)                              | 17.87 (6.60)              | 11.71 (2.77)              | 23.47 (12.04)             | 11.88 (2.91)              | 26.43 (8.88)              | 8.93 (1.62)                |
| R <sub>merge</sub> (%)              | 7.9 (23.8)                | 11.8 (49.9)               | 6.0 (14.6)                | 11.4 (47.6)               | 5.7 (17.4)                | 16.8 (83.0)                |
| R <sub>meas</sub> (%)               | 8.5 (25.8)                | 12.8 (54.1)               | 6.5 (15.8)                | 12.4 (51.8)               | 6.2 (18.9)                | 18.4 (84.4)                |
| CC <sub>1/2</sub> <sup>a</sup>      | 99.8 (96.7)               | 99.6 (88.7)               | 99.8 (98.7)               | 99.7 (87.8)               | 99.9 (98.3)               | 99.4 (75.8)                |
| Anomalous signal                    | 1.10 (0.78)               | 0.91 (0.72)               | 1.38 (1.19)               | 0.93 (0.78)               | 1.35 (0.93)               | 0.88 (0.69)                |

Values in parentheses are for the highest resolution shell. For native datasets, Friedel pairs were merged <sup>a</sup>Percentage of correlation between intensities from random half-datasets [1]. The correlation is significant at the 0.1% level in all resolution shells in all datasets.

**Table S1 (continued)** Crystallographic data statistics

| R2lox variant                       | V72L                      |                           |                           |                           |                           |                           |                           |                           |
|-------------------------------------|---------------------------|---------------------------|---------------------------|---------------------------|---------------------------|---------------------------|---------------------------|---------------------------|
| Soaking condition                   | anoxic Mn+Fe              |                           |                           |                           | aerobic Mn+Fe             |                           |                           |                           |
| Crystal                             | 1                         |                           | 2                         |                           | 1                         |                           | 2                         |                           |
| Beamline                            | X06SA/SLS                 | X06SA/SLS                 | X06SA/SLS                 | X06SA/SLS                 | X06SA/SLS                 | X06SA/SLS                 | X06SA/SLS                 | X06SA/SLS                 |
| Detector                            | Pilatus 6MF               | Pilatus 6MF               | Pilatus 6MF               | Pilatus 6MF               | Pilatus 6MF               | Pilatus 6MF               | Pilatus 6MF               | Pilatus 6MF               |
| Dataset                             | Fe peak                   | Mn peak                   | Fe peak                   | Mn peak                   | Fe peak                   | Mn peak                   | Fe peak                   | Mn peak                   |
| Wavelength (Å)                      | 1.73                      | 1.88                      | 1.73                      | 1.88                      | 1.73                      | 1.88                      | 1.73                      | 1.88                      |
| Resolution range (Å)                | 50.00-2.99<br>(3.17-2.99) | 50.00-2.99<br>(3.17-2.99) | 50.00-2.99<br>(3.17-2.99) | 50.00-2.99<br>(3.18-2.99) | 50.00-2.99<br>(3.17-2.99) | 50.00-2.98<br>(3.16-2.98) | 50.00-2.99<br>(3.17-2.99) | 50.00-2.96<br>(3.13-2.96) |
| Space group                         | C2                        | C2                        | C2                        | C2                        | C2                        | C2                        | C2                        | C2                        |
| Unit cell dimensions<br>a, b, c (Å) | 160.43,<br>55.70, 70.00   | 160.50, 55.72,<br>70.01   | 160.59, 55.70,<br>70.03   | 160.61, 55.72,<br>70.05   | 163.43, 55.74,<br>69.41   | 163.34, 55.78,<br>69.44   | 163.51, 55.58,<br>67.20   | 163.54, 55.59,<br>67.18   |
| $\beta$ (°)                         | 114.00                    | 114.01                    | 114.01                    | 114.03                    | 114.08                    | 114.05                    | 113.71                    | 113.71                    |
| Unique reflections                  | 21618 (3268)              | 21512 (3299)              | 21337 (3266)              | 21204 (3206)              | 21739 (3361)              | 21549 (3194)              | 20579 (3120)              | 20512 (2626)              |
| Multiplicity                        | 3.3                       | 3.3                       | 3.5                       | 3.5                       | 3.3                       | 3.2                       | 3.6                       | 3.4                       |
| Completeness (%)                    | 95.7 (89.9)               | 96.0 (91.4)               | 95.0 (90.6)               | 94.6 (88.7)               | 96.0 (92.2)               | 94.3 (86.4)               | 93.6 (88.3)               | 90.0 (71.5)               |
| $I/\sigma(I)$                       | 15.03 (8.15)              | 9.65 (4.85)               | 17.34 (10.08)             | 13.08 (7.23)              | 12.33 (4.99)              | 9.17 (3.20)               | 16.28 (7.38)              | 10.38 (3.20)              |
| $R_{\text{merge}}$ (%)              | 6.4 (13.4)                | 9.8 (22.9)                | 5.9 (10.9)                | 7.8 (15.0)                | 7.3 (19.9)                | 9.3 (27.7)                | 5.7 (14.2)                | 8.9 (29.9)                |
| $R_{\text{meas}}$ (%)               | 7.6 (16.1)                | 11.7 (27.8)               | 7.0 (13.0)                | 9.1 (17.8)                | 8.8 (24.1)                | 11.2 (33.9)               | 6.7 (16.8)                | 10.6 (35.7)               |
| $CC_{1/2}$ <sup>a</sup>             | 99.4 (97.8)               | 98.9 (93.5)               | 99.5 (98.4)               | 99.3 (97.0)               | 99.5 (95.6)               | 99.1 (91.5)               | 99.7 (97.8)               | 99.4 (90.3)               |
| Anomalous signal                    | 1.08 (1.00)               | 0.90 (0.98)               | 1.12 (0.98)               | 0.82 (0.82)               | 0.91 (0.76)               | 0.81 (0.75)               | 1.08 (0.90)               | 0.92 (0.87)               |

Values in parentheses are for the highest resolution shell. For native datasets, Friedel pairs were merged <sup>a</sup>Percentage of correlation between intensities from random half-datasets [1]. The correlation is significant at the 0.1% level in all resolution shells in all datasets.

**Table S1 (continued)** Crystallographic data statistics

| <b>R2lox variant</b>                | <b>Y162F</b>              |                           |                           |                           |                           |
|-------------------------------------|---------------------------|---------------------------|---------------------------|---------------------------|---------------------------|
| <b>Soaking condition</b>            | <b>anoxic Mn+Fe</b>       |                           |                           |                           |                           |
| Crystal                             | 1                         | 1                         | 1                         | 2                         | 2                         |
| Beamline                            | X06SA/SLS                 | X06SA/SLS                 | X06SA/SLS                 | X06SA/SLS                 | X06SA/SLS                 |
| Detector                            | Pilatus 6MF               | Pilatus 6MF               | Pilatus 6MF               | Pilatus 6MF               | Pilatus 6MF               |
| Dataset                             | native                    | Fe peak                   | Mn peak                   | Fe peak                   | Mn peak                   |
| Wavelength (Å)                      | 0.98                      | 1.73                      | 1.88                      | 1.73                      | 1.88                      |
| Resolution range (Å)                | 50.00-1.39<br>(1.48-1.39) | 50.00-3.00<br>(3.18-3.00) | 50.00-2.98<br>(3.16-2.98) | 50.00-3.00<br>(3.18-3.00) | 50.00-3.00<br>(3.18-3.00) |
| Space group                         | C2                        | C2                        | C2                        | C2                        | C2                        |
| Unit cell dimensions<br>a, b, c (Å) | 161.30, 55.60,<br>69.97   | 161.49, 55.66,<br>70.05   | 161.51, 55.66,<br>70.06   | 161.43, 55.62,<br>70.00   | 161.61, 55.62,<br>70.04   |
| $\beta$ (°)                         | 113.97                    | 114.02                    | 114.03                    | 114.01                    | 114.09                    |
| Unique reflections                  | 108553 (15299)            | 21896 (3470)              | 21855 (3127)              | 21742 (3452)              | 21694 (3347)              |
| Multiplicity                        | 3.3                       | 3.4                       | 3.4                       | 3.5                       | 3.5                       |
| Completeness (%)                    | 95.5 (83.7)               | 97.4 (95.2)               | 95.5 (85.0)               | 96.8 (94.6)               | 96.5 (91.6)               |
| $I/\sigma(I)$                       | 15.08 (1.06)              | 23.98 (15.13)             | 16.86 (9.22)              | 26.08 (17.59)             | 24.82 (12.98)             |
| $R_{\text{merge}}$ (%)              | 3.6 (98.6)                | 4.2 (6.6)                 | 5.8 (10.2)                | 3.9 (5.4)                 | 3.9 (7.4)                 |
| $R_{\text{meas}}$ (%)               | 4.2 (122.3)               | 4.9 (7.8)                 | 6.9 (12.3)                | 4.7 (6.5)                 | 4.7 (8.8)                 |
| $CC_{1/2}$ <sup>a</sup>             | 99.9 (56.8)               | 99.7 (99.3)               | 99.5 (98.5)               | 99.7 (99.5)               | 99.8 (99.2)               |
| Anomalous signal                    | -                         | 1.43 (1.16)               | 0.95 (0.89)               | 1.49 (1.21)               | 1.00 (0.90)               |

Values in parentheses are for the highest resolution shell. For native datasets, Friedel pairs were merged <sup>a</sup>Percentage of correlation between intensities from random half-datasets [1]. The correlation is significant at the 0.1% level in all resolution shells in all datasets.

**Table S1 (continued)** Crystallographic data statistics

| R2lox variant                       | Y162F                     |                           |                           |                           |                           |                           |                           |
|-------------------------------------|---------------------------|---------------------------|---------------------------|---------------------------|---------------------------|---------------------------|---------------------------|
| Soaking condition                   | aerobic Mn+Fe             |                           |                           |                           |                           |                           |                           |
| Crystal                             | 1                         | 1                         | 2                         | 2                         | 3                         | 3                         | 3                         |
| Beamline                            | X06SA/SLS                 | X06SA/SLS                 | X06SA/SLS                 | X06SA/SLS                 | X06SA/SLS                 | X06SA/SLS                 | X06SA/SLS                 |
| Detector                            | Pilatus 6MF               | Pilatus 6MF               | Pilatus 6MF               | Pilatus 6MF               | Pilatus 6MF               | Pilatus 6MF               | Pilatus 6MF               |
| Dataset                             | native                    | Fe peak                   | Mn peak                   | Fe peak                   | Mn peak                   | Fe peak                   | Mn peak                   |
| Wavelength (Å)                      | 0.98                      | 1.73                      | 1.88                      | 1.73                      | 1.88                      | 1.73                      | 1.88                      |
| Resolution range (Å)                | 50.00-1.90<br>(2.02-1.90) | 50.00-2.98<br>(3.16-2.98) | 50.00-2.98<br>(3.16-2.98) | 50.00-2.99<br>(3.18-2.99) | 50.00-2.99<br>(3.17-2.99) | 50.00-2.97<br>(3.15-2.97) | 50.00-2.97<br>(3.15-2.97) |
| Space group                         | C2                        | C2                        | C2                        | C2                        | C2                        | C2                        | C2                        |
| Unit cell dimensions<br>a, b, c (Å) | 162.75, 55.73,<br>69.46   | 162.97, 55.71,<br>69.39   | 162.81, 55.73,<br>69.38   | 162.84, 55.69,<br>69.28   | 162.88, 55.74,<br>69.33   | 162.90, 55.68,<br>68.95   | 162.78, 55.69,<br>68.89   |
| $\beta$ (°)                         | 113.92                    | 114.01                    | 113.98                    | 114.01                    | 114.00                    | 113.78                    | 113.80                    |
| Unique reflections                  | 42300 (5645)              | 21669 (3207)              | 21348 (3079)              | 21647 (3423)              | 21347 (3248)              | 21668 (3188)              | 21697 (3121)              |
| Multiplicity                        | 3.4                       | 3.4                       | 3.3                       | 3.4                       | 3.3                       | 3.3                       | 3.3                       |
| Completeness (%)                    | 94.2 (78.6)               | 94.9 (86.7)               | 93.2 (83.3)               | 96.4 (94.8)               | 94.6 (89.8)               | 94.8 (86.5)               | 94.8 (84.4)               |
| $I/\sigma(I)$                       | 14.87 (1.59)              | 18.85 (6.64)              | 10.31 (2.95)              | 13.72 (4.04)              | 8.73 (2.23)               | 12.32 (3.02)              | 9.46 (2.39)               |
| $R_{\text{merge}}$ (%)              | 4.3 (69.3)                | 5.0 (15.9)                | 9.2 (33.4)                | 7.0 (26.7)                | 11.0 (41.4)               | 7.4 (33.4)                | 9.1 (38.3)                |
| $R_{\text{meas}}$ (%)               | 5.1 (82.8)                | 5.9 (19.0)                | 10.9 (40.1)               | 8.3 (31.8)                | 13.1 (49.8)               | 8.8 (40.3)                | 10.9 (46.4)               |
| $CC_{1/2}$ <sup>a</sup>             | 99.9 (67.6)               | 99.8 (97.4)               | 99.4 (88.1)               | 99.7 (93.9)               | 99.3 (84.0)               | 99.6 (91.9)               | 99.5 (86.0)               |
| Anomalous signal                    | -                         | 1.14 (0.91)               | 0.91 (0.80)               | 1.00 (0.79)               | 0.87 (0.74)               | 0.98 (0.75)               | 0.88 (0.76)               |

Values in parentheses are for the highest resolution shell. For native datasets, Friedel pairs were merged <sup>a</sup>Percentage of correlation between intensities from random half-datasets [1]. The correlation is significant at the 0.1% level in all resolution shells in all datasets.



**Table S1 (continued)** Crystallographic data statistics

| <b>R2lox variant</b>                | <b>A171F</b>              |                           |                           |                           |                           |                           |                            |
|-------------------------------------|---------------------------|---------------------------|---------------------------|---------------------------|---------------------------|---------------------------|----------------------------|
| <b>Soaking condition</b>            | <b>anoxic Mn+Fe</b>       |                           |                           |                           |                           |                           |                            |
| <b>Crystal</b>                      | 1                         | 1                         | 2                         | 2                         | 3                         | 3                         | 3                          |
| Beamline                            | BL14.1/BESSY              | X10SA/SLS                 | X10SA/SLS                 | X10SA/SLS                 | X10SA/SLS                 | X10SA/SLS                 | X10SA/SLS                  |
| Detector                            | Pilatus 6M                | Pilatus 6MF               | Pilatus 6MF               | Pilatus 6MF               | Pilatus 6MF               | Pilatus 6MF               | Pilatus 6MF                |
| Dataset                             | native                    | Fe peak                   | Mn peak                   | Fe peak                   | Mn peak                   | Fe peak                   | Mn peak                    |
| Wavelength (Å)                      | 0.92                      | 1.73                      | 1.88                      | 1.73                      | 1.88                      | 1.73                      | 1.88                       |
| Resolution range (Å)                | 50.00-2.01<br>(2.13-2.01) | 50.00-2.99<br>(3.18-2.99) | 50.00-2.99<br>(3.18-2.99) | 50.00-2.98<br>(3.16-2.98) | 50.00-2.99<br>(3.17-2.99) | 50.00-3.00<br>(3.18-3.00) | 50.00-3.00 (3.18-<br>3.00) |
| Space group                         | I222                      | I222                      | I222                      | I222                      | I222                      | I222                      | I222                       |
| Unit cell dimensions<br>a, b, c (Å) | 55.98, 98.07,<br>127.63   | 55.87, 97.93,<br>127.37   | 55.87, 97.92,<br>127.41   | 55.92, 97.99,<br>127.62   | 55.87, 97.83,<br>127.67   | 55.88, 98.01,<br>127.55   | 55.90, 98.06,<br>127.53    |
| Unique reflections                  | 23799 (3753)              | 13572 (2150)              | 13569 (2153)              | 13753 (2168)              | 13654 (2173)              | 13392 (2095)              | 13387 (2112)               |
| Multiplicity                        | 6.6                       | 6.9                       | 6.7                       | 6.8                       | 6.7                       | 6.9                       | 6.8                        |
| Completeness (%)                    | 99.7 (98.7)               | 99.6 (97.7)               | 99.5 (97.6)               | 99.4 (96.5)               | 99.6 (97.6)               | 98.6 (95.4)               | 98.7 (96.1)                |
| I/σ(I)                              | 17.47 (1.07)              | 25.02 (8.68)              | 25.15 (7.95)              | 26.56 (8.52)              | 31.61 (9.51)              | 26.61 (7.86)              | 23.02 (5.37)               |
| R <sub>merge</sub> (%)              | 8.1 (166.8)               | 5.7 (18.6)                | 6.5 (24.4)                | 5.4 (19.3)                | 4.4 (16.7)                | 5.5 (22.0)                | 6.6 (31.4)                 |
| R <sub>meas</sub> (%)               | 8.8 (181.1)               | 6.2 (20.2)                | 7.1 (26.6)                | 5.8 (21.0)                | 4.8 (18.1)                | 6.0 (23.8)                | 7.1 (34.0)                 |
| CC <sub>1/2</sub> <sup>a</sup>      | 99.9 (43.7)               | 99.9 (98.5)               | 99.9 (97.6)               | 99.9 (98.3)               | 99.9 (98.7)               | 99.9 (98.2)               | 99.9 (96.2)                |
| Anomalous signal                    | -                         | 1.27 (0.88)               | 1.00 (1.04)               | 1.34 (0.85)               | 1.06 (0.85)               | 1.39 (0.92)               | 0.96 (0.83)                |

Values in parentheses are for the highest resolution shell. For native datasets, Friedel pairs were merged <sup>a</sup>Percentage of correlation between intensities from random half-datasets [1]. The correlation is significant at the 0.1% level in all resolution shells in all datasets.

**Table S1 (continued)** Crystallographic data statistics

| <b>R2lox variant</b>                | <b>A171F</b>              |                           |                           |                           |                           |                           |                           |                           |
|-------------------------------------|---------------------------|---------------------------|---------------------------|---------------------------|---------------------------|---------------------------|---------------------------|---------------------------|
| <b>Soaking condition</b>            | <b>anoxic Mn+Fe</b>       |                           |                           |                           |                           |                           |                           |                           |
| <b>Crystal</b>                      | <b>4</b>                  | <b>5</b>                  | <b>6</b>                  | <b>7</b>                  | <b>6</b>                  | <b>6</b>                  | <b>7</b>                  | <b>7</b>                  |
| Beamline                            | X10SA/SLS                 | X10SA/SLS                 | X06SA/SLS                 | X06SA/SLS                 | X06SA/SLS                 | X06SA/SLS                 | X06SA/SLS                 | X06SA/SLS                 |
| Detector                            | Pilatus 6MF               | Pilatus 6MF               | Pilatus 6MF               | Pilatus 6MF               | Pilatus 6MF               | Pilatus 6MF               | Pilatus 6MF               | Pilatus 6MF               |
| Dataset                             | Fe peak                   | Mn peak                   | Fe peak                   | Mn peak                   | Fe peak                   | Mn peak                   | Fe peak                   | Mn peak                   |
| Wavelength (Å)                      | 1.73                      | 1.88                      | 1.73                      | 1.88                      | 1.73                      | 1.88                      | 1.73                      | 1.88                      |
| Resolution range (Å)                | 50.00-2.99<br>(3.17-2.99) | 50.00-2.99<br>(3.18-2.99) | 50.00-2.99<br>(3.17-2.99) | 50.00-3.00<br>(3.18-3.00) | 50.00-2.99<br>(3.17-2.99) | 50.00-3.00<br>(3.18-3.00) | 50.00-3.00<br>(3.18-3.00) | 50.00-3.00<br>(3.18-3.00) |
| Space group                         | I222                      | I222                      | I222                      | I222                      | I222                      | I222                      | I222                      | I222                      |
| Unit cell dimensions<br>a, b, c (Å) | 55.89, 98.07,<br>127.85   | 55.87, 98.00,<br>127.83   | 55.94, 98.18,<br>127.10   | 55.94, 98.18,<br>127.99   | 55.98, 98.20,<br>128.07   | 55.10, 98.20,<br>128.12   | 56.07, 98.27,<br>128.15   | 56.07, 98.22,<br>128.15   |
| Unique reflections                  | 13624 (2140)              | 13653 (2194)              | 13611 (2064)              | 13497 (2166)              | 13680 (2121)              | 13686<br>(2174)           | 13705 (2206)              | 13695 (2198)              |
| Multiplicity                        | 6.8                       | 6.8                       | 6.9                       | 6.8                       | 6.9                       | 6.9                       | 6.9                       | 6.4                       |
| Completeness (%)                    | 99.3 (96.1)               | 99.7 (98.3)               | 98.3 (92.2)               | 98.6 (96.7)               | 99.1 (94.9)               | 99.6 (97.6)               | 99.8 (99.1)               | 99.7 (98.7)               |
| I/σ(I)                              | 20.09 (6.10)              | 20.43 (5.24)              | 14.74 (6.79)              | 15.04 (7.66)              | 17.97 (6.56)              | 19.11 (7.02)              | 24.29 (9.71)              | 22.52 (9.02)              |
| R <sub>merge</sub> (%)              | 7.3 (27.2)                | 7.4 (32.3)                | 10.1 (21.8)               | 9.8 (19.1)                | 8.2 (24.6)                | 7.5 (21.6)                | 5.9 (15.8)                | 6.4 (16.7)                |
| R <sub>meas</sub> (%)               | 7.9 (29.5)                | 8.0 (35.1)                | 11.0 (23.6)               | 10.7 (20.7)               | 8.9 (26.7)                | 8.1 (23.5)                | 6.4 (17.1)                | 6.9 (18.1)                |
| CC <sub>1/2</sub> <sup>a</sup>      | 99.8 (96.9)               | 99.8 (95.2)               | 99.5 (97.7)               | 99.4 (98.0)               | 99.8 (97.4)               | 99.8 (98.1)               | 99.8 (98.8)               | 99.8 (98.7)               |
| Anomalous signal                    | 1.15 (0.83)               | 0.92 (0.85)               | 1.10 (0.81)               | 0.93 (0.88)               | 1.17 (0.85)               | 0.94 (0.80)               | 1.44 (1.02)               | 0.96 (0.80)               |

Values in parentheses are for the highest resolution shell. For native datasets, Friedel pairs were merged <sup>a</sup>Percentage of correlation between intensities from random half-datasets [1]. The correlation is significant at the 0.1% level in all resolution shells in all datasets.

**Table S1 (continued)** Crystallographic data statistics

| <b>R2lox variant</b>                | <b>A171F</b>              |                           |                           |                           |                           |                           |                           |
|-------------------------------------|---------------------------|---------------------------|---------------------------|---------------------------|---------------------------|---------------------------|---------------------------|
| <b>Soaking condition</b>            | <b>anoxic Mn+Fe</b>       |                           | <b>aerobic Mn+Fe</b>      |                           |                           |                           |                           |
| Crystal                             | 8                         |                           | 1                         | 1                         | 1                         | 2                         |                           |
| Beamline                            | X06SA/SLS                 | X06SA/SLS                 | X06SA/SLS                 | X06SA/SLS                 | X06SA/SLS                 | X06SA/SLS                 | X06SA/SLS                 |
| Detector                            | Pilatus 6MF               | Pilatus 6MF               | Pilatus 6MF               | Pilatus 6MF               | Pilatus 6MF               | Pilatus 6MF               | Pilatus 6MF               |
| Dataset                             | Fe peak                   | Mn peak                   | native                    | Fe peak                   | Mn peak                   | Fe peak                   | Mn peak                   |
| Wavelength (Å)                      | 1.73                      | 1.88                      | 1.00                      | 1.73                      | 1.88                      | 1.73                      | 1.88                      |
| Resolution range (Å)                | 50.00-3.00<br>(3.18-3.00) | 50.00-3.00<br>(3.18-3.00) | 50.00-1.95<br>(2.07-1.95) | 50.00-3.00<br>(3.18-3.00) | 50.00-3.00<br>(3.18-3.00) | 50.00-3.00<br>(3.18-3.00) | 50.00-2.99<br>(3.17-2.99) |
| Space group                         | I222                      | I222                      | I222                      | I222                      | I222                      | I222                      | I222                      |
| Unit cell dimensions<br>a, b, c (Å) | 55.98, 98.31,<br>127.80   | 56.00, 98.33,<br>127.84   | 55.97, 97.20,<br>128.23   | 55.86, 97.19,<br>128.08   | 55.87, 97.20,<br>128.11   | 55.95, 97.38,<br>128.69   | 55.88, 97.24,<br>128.56   |
| Unique reflections                  | 13685 (2188)              | 13690 (2185)              | 25690 (4075)              | 13511 (2157)              | 13517 (2164)              | 13588 (2121)              | 13582 (2115)              |
| Multiplicity                        | 6.8                       | 6.7                       | 3.7                       | 6.9                       | 6.9                       | 6.7                       | 6.7                       |
| Completeness (%)                    | 99.6 (97.7)               | 99.6 (97.5)               | 98.7 (98.2)               | 99.8 (99.2)               | 99.9 (99.4)               | 99.4 (96.4)               | 99.4 (96.4)               |
| I/σ(I)                              | 24.07 (10.11)             | 22.17 (8.92)              | 15.33 (1.47)              | 17.54 (7.37)              | 16.65 (6.50)              | 20.04 (4.97)              | 20.08 (4.97)              |
| R <sub>merge</sub> (%)              | 6.0 (15.4)                | 6.4 (17.1)                | 4.5 (87.7)                | 8.4 (20.5)                | 8.9 (23.6)                | 7.6 (33.8)                | 7.3 (33.2)                |
| R <sub>meas</sub> (%)               | 6.5 (16.7)                | 7.0 (18.6)                | 5.2 (103.4)               | 9.1 (22.3)                | 9.6 (25.4)                | 8.3 (36.8)                | 7.9 (36.1)                |
| CC <sub>1/2</sub> <sup>a</sup>      | 99.8 (98.9)               | 99.8 (98.6)               | 99.9 (60.4)               | 99.7 (98.1)               | 99.7 (97.2)               | 99.9 (94.3)               | 99.9 (94.5)               |
| Anomalous signal                    | 1.39 (0.97)               | 0.95 (0.79)               | -                         | 1.05 (0.82)               | 1.03 (0.81)               | 1.10 (0.78)               | 1.06 (0.80)               |

Values in parentheses are for the highest resolution shell. For native datasets, Friedel pairs were merged <sup>a</sup>Percentage of correlation between intensities from random half-datasets [1]. The correlation is significant at the 0.1% level in all resolution shells in all datasets.

**Table S1 (continued)** Crystallographic data statistics

| <b>R2lox variant</b>                | <b>A171F</b>              |                           |                           |                           |                           |                           |                           |                           |
|-------------------------------------|---------------------------|---------------------------|---------------------------|---------------------------|---------------------------|---------------------------|---------------------------|---------------------------|
| <b>Soaking condition</b>            | <b>aerobic Mn+Fe</b>      |                           |                           |                           |                           |                           |                           |                           |
| <b>Crystal</b>                      | <b>3</b>                  |                           | <b>4</b>                  |                           | <b>5</b>                  |                           | <b>6</b>                  |                           |
| Beamline                            | X06SA/SLS                 | X06SA/SLS                 | X06SA/SLS                 | X06SA/SLS                 | X06SA/SLS                 | X06SA/SLS                 | X06SA/SLS                 | X06SA/SLS                 |
| Detector                            | Pilatus 6MF               | Pilatus 6MF               | Pilatus 6MF               | Pilatus 6MF               | Pilatus 6M                | Pilatus 6M                | Pilatus 6M                | Pilatus 6M                |
| Dataset                             | Fe peak                   | Mn peak                   | Fe peak                   | Mn peak                   | Fe peak                   | Mn peak                   | Fe peak                   | Mn peak                   |
| Wavelength (Å)                      | 1.73                      | 1.88                      | 1.73                      | 1.88                      | 1.73                      | 1.88                      | 1.73                      | 1.88                      |
| Resolution range (Å)                | 50.00-2.95<br>(3.13-2.95) | 50.00-2.97<br>(3.15-2.97) | 50.00-3.00<br>(3.19-3.00) | 50.00-3.00<br>(3.18-3.00) | 50.00-3.00<br>(3.19-3.00) | 50.00-3.00<br>(3.18-3.00) | 50.00-3.00<br>(3.18-3.00) | 50.00-3.00<br>(3.18-3.00) |
| Space group                         | I222                      | I222                      | I222                      | I222                      | I222                      | I222                      | I222                      | I222                      |
| Unit cell dimensions<br>a, b, c (Å) | 55.93, 97.58,<br>128.74   | 55.96, 97.40,<br>128.84   | 55.73, 97.28,<br>128.20   | 55.74, 97.27,<br>128.22   | 55.87, 97.50,<br>128.44   | 55.88, 97.40,<br>128.36   | 55.76, 97.10,<br>128.11   | 55.76, 97.10,<br>128.10   |
| Unique reflections                  | 13769 (1799)              | 13798 (1996)              | 13457 (2156)              | 13449 (2119)              | 13500 (2138)              | 13505 (2173)              | 13499 (2192)              | 13480 (2151)              |
| Multiplicity                        | 6.7                       | 6.5                       | 6.8                       | 6.7                       | 6.7                       | 6.6                       | 6.8                       | 6.7                       |
| Completeness (%)                    | 96.5 (78.5)               | 98.0 (87.7)               | 99.9 (99.3)               | 99.6 (97.6)               | 99.6 (97.6)               | 99.3 (95.9)               | 99.7 (98.2)               | 99.8 (98.7)               |
| I/ $\sigma$ (I)                     | 14.11 (3.42)              | 12.14 (2.54)              | 13.46 (5.77)              | 10.25 (3.40)              | 8.61 (2.23)               | 8.06 (1.85)               | 9.22 (2.89)               | 9.50 (2.83)               |
| $R_{\text{merge}}$ (%)              | 10.3 (49.3)               | 12.3 (68.3)               | 10.5 (22.5)               | 13.8 (37.7)               | 17.0 (62.8)               | 19.3 (73.5)               | 15.7 (45.7)               | 15.5 (48.8)               |
| $R_{\text{meas}}$ (%)               | 11.2 (53.8)               | 13.3 (74.7)               | 11.4 (24.5)               | 15.0 (41.2)               | 18.4 (68.2)               | 21.0 (80.1)               | 17.0 (49.7)               | 16.8 (53.3)               |
| $CC_{1/2}$ <sup>a</sup>             | 99.7 (89.7)               | 99.6 (83.6)               | 99.4 (96.9)               | 99.3 (91.1)               | 99.3 (80.0)               | 99.1 (75.0)               | 99.2 (89.1)               | 99.3 (86.8)               |
| Anomalous signal                    | 0.95 (0.80)               | 0.91 (0.70)               | 0.94 (0.75)               | 0.91 (0.83)               | 0.85 (0.74)               | 0.90 (0.74)               | 0.86 (0.73)               | 0.85 (0.74)               |

Values in parentheses are for the highest resolution shell. For native datasets, Friedel pairs were merged <sup>a</sup>Percentage of correlation between intensities from random half-datasets [1]. The correlation is significant at the 0.1% level in all resolution shells in all datasets.

**Table S2** Refinement statistics

| R2lox variant                                           | Y162F                     |                           | A171F         |              |
|---------------------------------------------------------|---------------------------|---------------------------|---------------|--------------|
|                                                         | Soaking condition         | anoxic Mn+Fe              | aerobic Mn+Fe | anoxic Mn+Fe |
| Crystal                                                 | 1                         | 1                         | 1             | 1            |
| Dataset                                                 | native                    | native                    | native        | native       |
| PDB ID                                                  | 6F6M                      | 6F6L                      | 6F6B          | 6F65         |
| Resolution range (Å)                                    | 43.52-1.39                | 43.46-1.90                | 48.62-2.01    | 48.50-1.95   |
| Reflections used                                        | 108378                    | 42235                     | 23791         | 25686        |
| $R_{\text{work}}/R_{\text{free}}$ (%) <sup>a</sup>      | 14.9/18.7                 | 16.6/20.4                 | 18.1/22.6     | 17.7/20.7    |
| Coordinate error (Å)                                    | 0.19                      | 0.25                      | 0.32          | 0.26         |
| Non-H atoms                                             | 4894                      | 4758                      | 2425          | 2445         |
| Protein residues <sup>b</sup>                           | 556 (3-250;263-286/3-286) | 556 (3-286/3-250;263-286) | 286 (2-287)   | 285 (2-286)  |
| Water molecules                                         | 218                       | 111                       | 50            | 60           |
| Ligand molecules                                        | 2                         | 2                         | 0             | 1            |
| Metal ions                                              | 6                         | 6                         | 3             | 3            |
| rmsd bonds (Å) <sup>c</sup>                             | 0.013                     | 0.017                     | 0.019         | 0.018        |
| rmsd angles (°) <sup>c</sup>                            | 0.984                     | 1.052                     | 1.402         | 1.094        |
| Ramachandran favored/allowed/ outliers (%) <sup>d</sup> | 97.3/2.5/0.2              | 96.9/3.1/0.0              | 97.2/2.8/0.0  | 96.5/3.5/0.0 |
| Clashscore <sup>d</sup>                                 | 2.81                      | 2.39                      | 3.20          | 2.55         |
| Wilson $B$ factor (Å <sup>2</sup> )                     | 22.1                      | 39.0                      | 44.3          | 43.4         |
| Average $B$ factors (Å <sup>2</sup> ) <sup>e,f</sup>    |                           |                           |               |              |
| all atoms                                               | 36.7                      | 52.4                      | 58.4          | 58.9         |
| protein main and side chains                            | 34.8/38.1                 | 52.0/53.0                 | 58.5          | 59.0         |
| site 1 metal ion                                        | 20.1/21.9                 | 32.4/37.2                 | 38.0          | 36.7         |
| site 2 metal ion                                        | 21.8/23.0                 | 38.5/40.8                 | 37.0          | 39.4         |
| additional metal ions                                   | 54.9/44.9                 | 76.3/83.8                 | 80.6          | 77.1         |
| ligand                                                  | 51.4/51.1                 | 54.1/58.8                 | -             | 70.9         |
| water                                                   | 37.4                      | 45                        | 47.3          | 50.5         |
| Occupancies <1.0 <sup>f</sup>                           |                           |                           |               |              |
| site 1 metal ion                                        | -                         | -                         | -             | -            |
| site 2 metal ion                                        | -                         | -                         | -             | -            |
| additional metal ions                                   | 0.82/0.67                 | 0.75/0.84                 | -             | 0.70         |

<sup>a</sup> $R_{\text{free}}$  is calculated from a randomly selected subset of approximately 2000 reflections (corresponding to up to 5% of reflections) excluded from refinement. <sup>b</sup>Residues out of the 302 residue full-length protein included in the final model are given in parentheses. <sup>c</sup>Root-mean-square deviation from ideal geometry. <sup>d</sup>Geometry statistics were calculated with MolProbity [2]. <sup>e</sup>Average  $B$  factors were calculated with Baverage in the CCP4 suite [3]. <sup>f</sup>Where there are 2 molecules in the asymmetric unit, the values for chain A and chain B are given separately where applicable (A/B).

## References

1. Karplus PA, Diederichs K (2012) Linking Crystallographic Model and Data Quality. *Science* 336:1030–1033. doi: 10.1126/science.1218231
2. Chen VB, Arendall 3rd WB, Headd JJ, et al (2010) MolProbity: all-atom structure validation for macromolecular crystallography. *Acta Crystallogr Sect D Biol Crystallogr* 66:12–21. doi: 10.1107/S0907444909042073
3. Winn MD, Ballard CC, Cowtan KD, et al (2011) Overview of the CCP4 suite and current developments. *Acta Crystallogr Sect D Biol Crystallogr* 67:235–242. doi: 10.1107/S0907444910045749
